# Supplementary material
Source: publisher figshare collection journal article supplement (https://acs.figshare.com/ndownloader/files/12776225)
Supplement: Supplementary file 1 [file 12776225]

## Supporting Information

### **Efficient Defect Healing of Transition Metal Dichalcogenides by Metallophthalocyanine**

*Hyeyoung Ahn,<sup>\*1</sup> Yu-Chiao Huang,<sup>1</sup> Chang-Wei Lin,<sup>1</sup> Yi-Lun Chiu,<sup>1</sup> Erh-Chen Lin,<sup>2</sup> Ying-Yu Lai,<sup>2</sup> and Yi-Hsien Lee<sup>2</sup>*

<sup>1</sup>Department of Photonics, National Chiao Tung University, Hsinchu 30010, Taiwan.

<sup>2</sup>Institute of NanoEngineering and MicroSystems, National Tsing-Hua University, Hsinchu 30010, Taiwan.

E-mail: [hyahn@mail.nctu.edu.tw](mailto:hyahn@mail.nctu.edu.tw) (Hyeyoung Ahn)

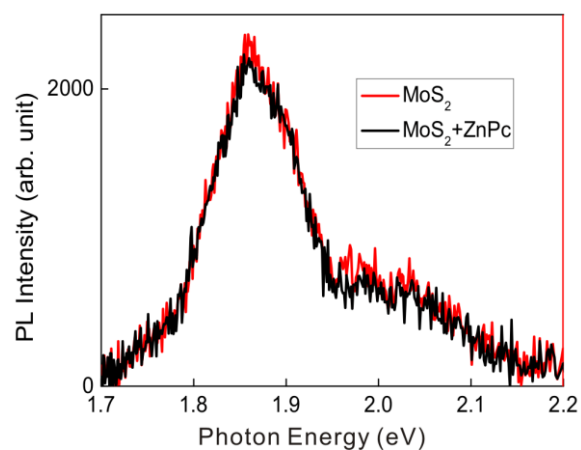

**Figure S1.** PL spectra of CVD-grown monolayer  $\text{MoS}_2$  before and after functionalization with ZnPc measured at room temperature. Broad two peaks are related to the spin-orbit split B-exciton. Due to unfavorable charge transfer from  $\text{MoS}_2$ , the PL signal remains nearly unchanged after MPc functionalization.

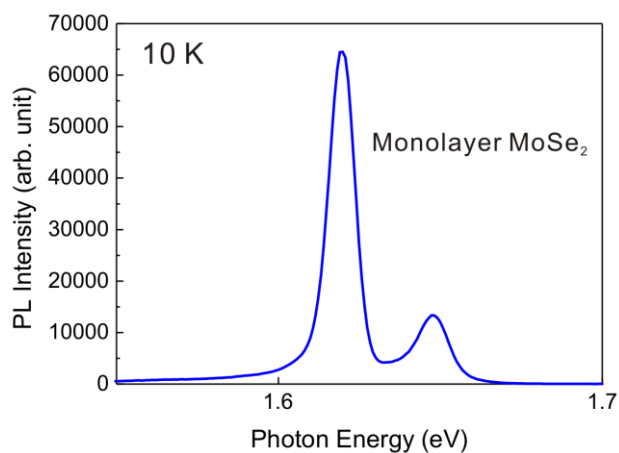

**Figure S2.** PL spectrum of mechanically exfoliated monolayer  $\text{MoSe}_2$  measured at 10 K. Narrow and well-separated trion and exciton peaks can be observed. Details of exfoliation and transfer process can be found in Ref. [1].

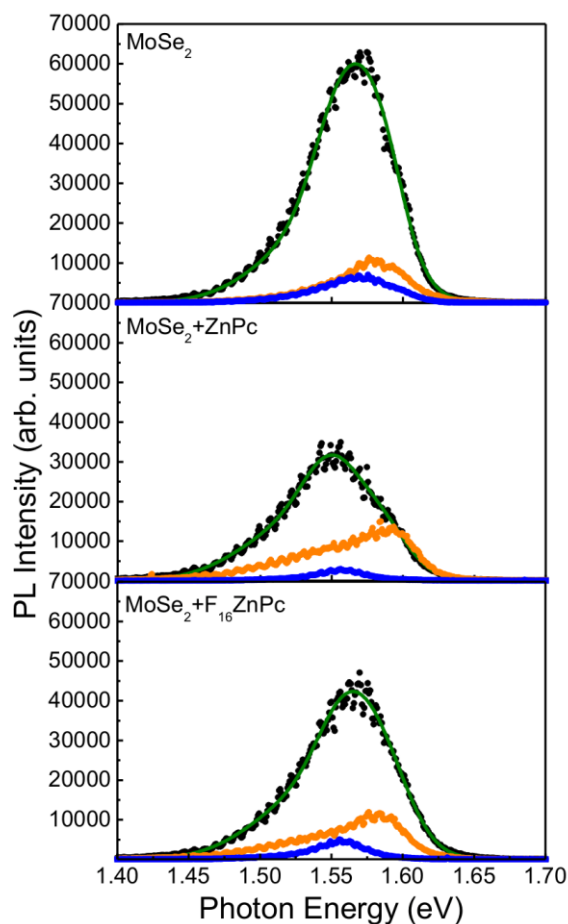

**Figure S3.** PL spectra of as-grown MoSe<sub>2</sub>, MoSe<sub>2</sub>+ZnPc, and MoSe<sub>2</sub>+F<sub>16</sub>ZnPc measured at 10 K (black dots), 60K (orange dots), and 200 K (blue dots). Although the PL quenching rate is different, thermal evolution of PL of trions and excitons are very similar for MoSe<sub>2</sub>+ZnPc and MoSe<sub>2</sub>+F<sub>16</sub>ZnPc.

#### References

- [1] Desai, S. B.; Madhvapathy, S. R.; Amani, M.; Kiriya, D.; Hettick, M.; Tosun, M.; Zhou, Y.; Dubey, M.; Ager III, J. W.; Chrzan, D.; Javey, A. Gold-Mediated Exfoliation of Ultralarge Optoelectronically-Perfect Monolayers, *Adv. Mater.* **2016**, 28, 4053–4058.
